# Supplementary material for: Single-shot regional anesthesia for laparoscopic cholecystectomies: a systematic review and network meta-analysis
Source: PubMed Central journal article supplement — Korean J Anesthesiol. 2022 Nov 8;76(1):34–46. doi: 10.4097/kja.22366 (PMC9902189; doi:10.4097/kja.22366), 2022-11-08
Supplement: kja-22366-suppl1.pdf [file kja-22366-suppl1.pdf]

Supplementary material 1. Search Strategy

|                                                                                                                                                                      |
|----------------------------------------------------------------------------------------------------------------------------------------------------------------------|
| Pubmed                                                                                                                                                               |
| (cholecystectomy AND (lps or laparoscopic)) AND (infiltration OR anesthesi* OR anaesthesi* OR block OR analgesi* OR pain) NOT retrospective NOT cohort NOT pediatric |
| CENTRAL                                                                                                                                                              |
| (cholecystectomy AND (lps or laparoscopic)) AND (infiltration OR anesthesi* OR anaesthesi* OR block OR analgesi* OR pain) NOT retrospective NOT cohort NOT pediatric |
| Scopus                                                                                                                                                               |
| (cholecystectomy AND (lps or laparoscopic)) AND (infiltration OR anesthesi* OR anaesthesi* OR block OR analgesi* OR pain) NOT retrospective NOT cohort NOT pediatric |
| Web of Science                                                                                                                                                       |
| (cholecystectomy AND (lps or laparoscopic)) AND (infiltration OR anesthesi* OR anaesthesi* OR block OR analgesi* OR pain) NOT retrospective NOT cohort NOT pediatric |
