# Supplementary material for: Single-shot regional anesthesia for laparoscopic cholecystectomies: a systematic review and network meta-analysis
Source: PubMed Central journal article supplement — Korean J Anesthesiol. 2022 Nov 8;76(1):34–46. doi: 10.4097/kja.22366 (PMC9902189; doi:10.4097/kja.22366), 2022-11-08
Supplement: kja-22366-suppl4.pdf [file kja-22366-suppl4.pdf]

## Supplementary material 4. Direct and indirect evidence

### Table Legends

d: Estimated treatment effect (Mean Difference or Odds Ratio) derived from direct evidence  
i: Estimated treatment effect (Mean Difference or Odds Ratio) derived from indirect evidence  
Diff: difference between direct and indirect treatment estimates  
P: p-value of test for disagreement (direct vs indirect)  
RoR: Ratio of Rtios (direct vs indirect)



## Pain 12 hours

|           |      | IP    | PVB   | Placebo | QL    | RS    | STAP  | TAP   | WI     |
|-----------|------|-------|-------|---------|-------|-------|-------|-------|--------|
| ESP block | d    |       |       | -1.41   | -0.11 |       | -0.36 |       |        |
|           | i    | -1.13 | -0.88 | -2.11   | 0.21  | -1.27 | 0.30  | 0.10  | -0.58  |
|           | diff |       |       | 0.69    | -0.31 |       | -0.66 |       |        |
|           | p    |       |       | 0.235   | 0.654 |       | 0.338 |       |        |
| IP        | d    | -     |       | -0.63   |       | 0.09  | 0.25  | 2.00  | 1.08   |
|           | i    | -     | 0.25  | 0.39    | 1.19  | -0.34 | 1.42  | 1.11  | 0.08   |
|           | diff | -     |       | -1.02   |       | 0.43  | -1.18 | 0.88  | 1.00   |
|           | p    | -     |       | 0.015   |       | 0.600 | 0.056 | 0.192 | 0.001  |
| PVB       | d    | -     | -     | -0.80   |       |       |       |       |        |
|           | i    | -     | -     |         | 0.94  | -0.39 | 1.00  | 0.99  | 0.30   |
|           | diff | -     | -     |         |       |       |       |       |        |
|           | p    | -     | -     |         |       |       |       |       |        |
| Placebo   | d    | -     | -     | -       | 1.88  | 0.32  | 1.33  | 1.40  | 1.29   |
|           | i    | -     | -     | -       | 1.65  | 0.81  | 2.01  | 2.20  | 0.45   |
|           | diff | -     | -     | -       | 0.22  | -0.48 | -0.68 | -0.80 | 0.84   |
|           | p    | -     | -     | -       | 0.742 | 0.644 | 0.121 | 0.065 | 0.012  |
| QL        | d    | -     | -     | -       | -     |       | 0.20  |       |        |
|           | i    | -     | -     | -       | -     | -1.33 | 0.09  | 0.05  | -0.64  |
|           | diff | -     | -     | -       | -     |       | -0.07 |       |        |
|           | p    | -     | -     | -       | -     |       | 0.918 |       |        |
| RS        | d    | -     | -     | -       | -     | -     |       |       |        |
|           | i    | -     | -     | -       | -     | -     | 1.38  | 1.37  | 0.69   |
|           | diff | -     | -     | -       | -     | -     |       |       |        |
|           | p    | -     | -     | -       | -     | -     |       |       |        |
| STAP      | d    | -     | -     | -       | -     | -     | -     | -0.59 | -1.26' |
|           | i    | -     | -     | -       | -     | -     | -     | 0.31  | -0.29  |
|           | diff | -     | -     | -       | -     | -     | -     | -0.90 | -0.96  |
|           | p    | -     | -     | -       | -     | -     | -     | 0.091 | 0.025  |
| TAP       | d    | -     | -     | -       | -     | -     | -     | -     | 1.16   |
|           | i    | -     | -     | -       | -     | -     | -     | -     | 0.09   |
|           | diff | -     | -     | -       | -     | -     | -     | -     | 1.06   |
|           | p    | -     | -     | -       | -     | -     | -     | -     | 0.015  |

## Pain at 24 h



**PONV**

|           |      | IP   | PVB  | Placebo | QL    | STAP  | TAP   | WI    |
|-----------|------|------|------|---------|-------|-------|-------|-------|
| ESP block | d    | -    | -    | 0.68    | 1.00  | 0.46  | -     | -     |
|           | i    | 0.63 | 0.79 | 0.20    | 1.36  | 1.38  | 1.30  | 0.77  |
|           | RoR  |      |      | 3.27    | 0.73  | 0.34  | -     | -     |
|           | p    |      |      | 0.086   | 0.791 | 0.117 | -     | -     |
| IP        | d    | -    |      | 0.67    | -     | 2.03  | -     | 1.76  |
|           | i    | -    | 1.25 | 2.45    | 1.72  | 1.27  | 2.05  | 1.02  |
|           | diff | -    |      | 0.27    | -     | 1.60  | -     | 1.72  |
|           | p    | -    |      | 0.047   | -     | 0.605 | -     | 0.25  |
| PVB       | d    | -    | -    | 0.58    | -     | -     | -     | -     |
|           | i    | -    | -    | -       | 1.37  | 1.07  | 1.63  | 0.97  |
|           | diff | -    | -    | -       | -     | -     | -     | -     |
|           | p    | -    | -    | -       | -     | -     | -     | -     |
| QL        | d    | -    | -    | -       | -     | 0.65  |       |       |
|           | i    | -    | -    | 0.42    | -     | 0.88  | 1.18  | 0.71  |
|           | diff | -    | -    | -       | -     | 0.73  | -     | -     |
|           | p    | -    | -    | -       | -     | 0.791 | -     | -     |
| STAP      | d    | -    | -    | 0.49    | -     | -     | 0.64  | 0.13  |
|           | i    | -    | -    | 0.62    | -     | -     | 1.75  | 1.00  |
|           | diff | -    | -    | 0.79    | -     | -     | 0.36  | 0.13  |
|           | p    | -    | -    | 0.701   | -     | -     | 0.328 | 0.165 |
| TAP       | d    | -    | -    | 0.35    | -     | -     | -     | 0.55  |
|           | i    | -    | -    | 0.35    | -     | -     | -     | 0.78  |
|           | diff | -    | -    | 0.97    | -     | -     | -     | 0.70  |
|           | p    | -    | -    | 0.962   | -     | -     | -     | 0.497 |
| WI        |      | -    | -    | 0.53    | -     | -     | -     | -     |
|           |      | -    | -    | 0.88    | -     | -     | -     | -     |
|           |      | -    | -    | 0.89    | -     | -     | -     | -     |
|           |      | -    | -    | 0.271   | -     | -     | -     | -     |

### Additional analgesics

|           |      | IP   | PVB  | Placebo | QL    | STAP  | TAP   | WI    |
|-----------|------|------|------|---------|-------|-------|-------|-------|
| ESP block | d    | -    | -    | 0.68    | 1.00  | 0.46  | -     | -     |
|           | i    | 0.63 | 0.79 | 0.21    | 1.36  | 1.38  | 1.30  | 0.78  |
|           | diff | -    | -    | 3.27    | 0.73  | 0.34  | -     | -     |
|           | p    | -    | -    | 0.086   | 0.791 | 0.117 | -     | -     |
| IP        | d    | -    | -    | 0.67    | -     | 2.03  |       | 1.75  |
|           | i    | -    | 1.25 | 2.45    | 1.72  | 1.27  | 2.05  | 1.02  |
|           | diff | -    |      | 0.27    | -     | 1.60  | -     | 1.72  |
|           | p    | -    |      | 0.047   | -     | 0.605 | -     | 0.245 |
| PVB       | d    | -    | -    | 0.577   | -     | -     | -     | -     |
|           | i    | -    | -    | -       | 1.37  | 1.07  | 1.63  | 0.98  |
|           | diff | -    | -    | -       | -     | -     | -     | -     |
|           | p    | -    | -    | -       | -     | -     | -     | -     |
| QL        | d    | -    | -    | -       | -     | 0.64  | -     | -     |
|           | i    | -    | -    | 0.42    | -     | 0.88  | 1.18  | 0.71  |
|           | diff | -    | -    | -       | -     | 0.73  | -     | -     |
|           | p    | -    | -    | -       | -     | 0.791 | -     | -     |
| STAP      | d    | -    | -    | 0.50    | -     | -     | 0.64  | 0.13  |
|           | i    | -    | -    | 0.62    | -     | -     | 1.75  | 1.00  |
|           | diff | -    | -    | 0.79    | -     | -     | 0.36  | 0.13  |
|           | p    | -    | -    | 0.701   | -     | -     | 0.328 | 0.165 |
| TAP       | d    | -    | -    | 0.35    | -     | -     | -     | 0.55  |
|           | i    | -    | -    | 0.36    | -     | -     | -     | 0.78  |
|           | diff | -    | -    | 0.97    | -     | -     | -     | 0.70  |
|           | p    | -    | -    | 0.962   | -     | -     | -     | 0.497 |
| WI        | d    | -    | -    | 0.53    | -     | -     | -     | -     |
|           | i    | -    | -    | 0.88    | -     | -     | -     | -     |
|           | diff | -    | -    | 0.60    | -     | -     | -     | -     |
|           | p    | -    | -    | 0.271   | -     | -     | -     | -     |
