# Supplementary material for: Single-shot regional anesthesia for laparoscopic cholecystectomies: a systematic review and network meta-analysis
Source: PubMed Central journal article supplement — Korean J Anesthesiol. 2022 Nov 8;76(1):34–46. doi: 10.4097/kja.22366 (PMC9902189; doi:10.4097/kja.22366), 2022-11-08

Supplementary material 5. Funnel Plots

**Main Outcome- Postoperative opioid consumption at 24 hours**

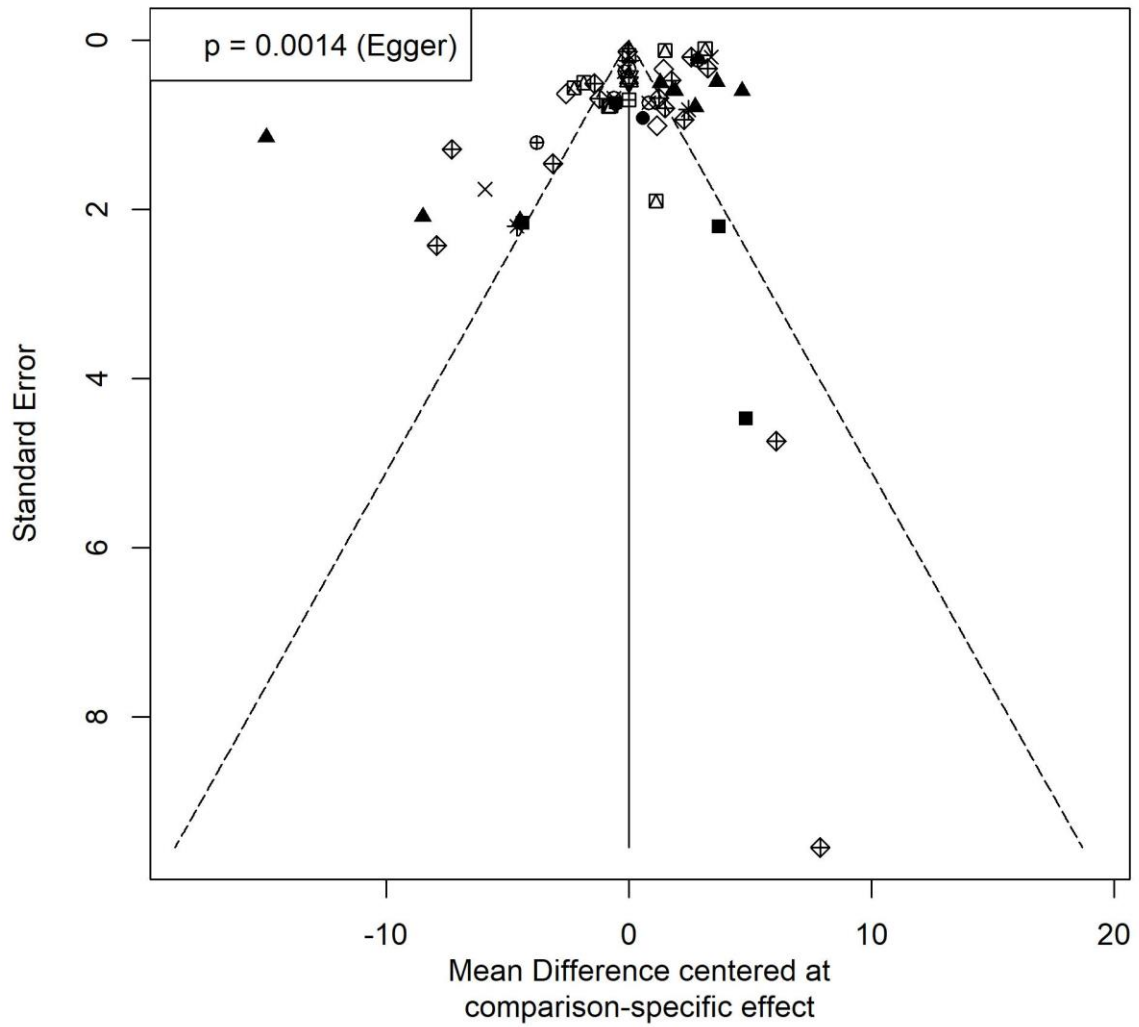

# Pain at 12 hours

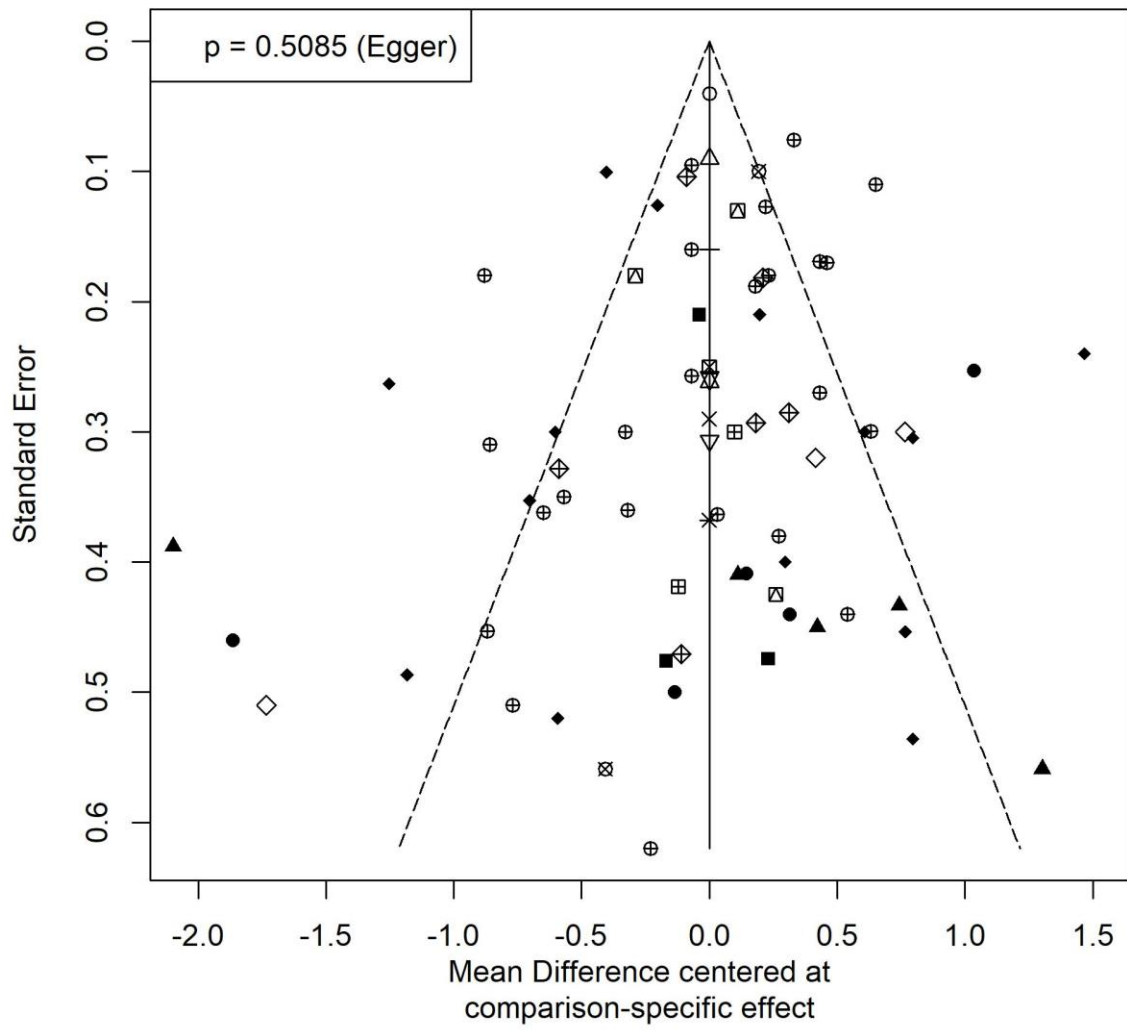

# Pain at 24 hours

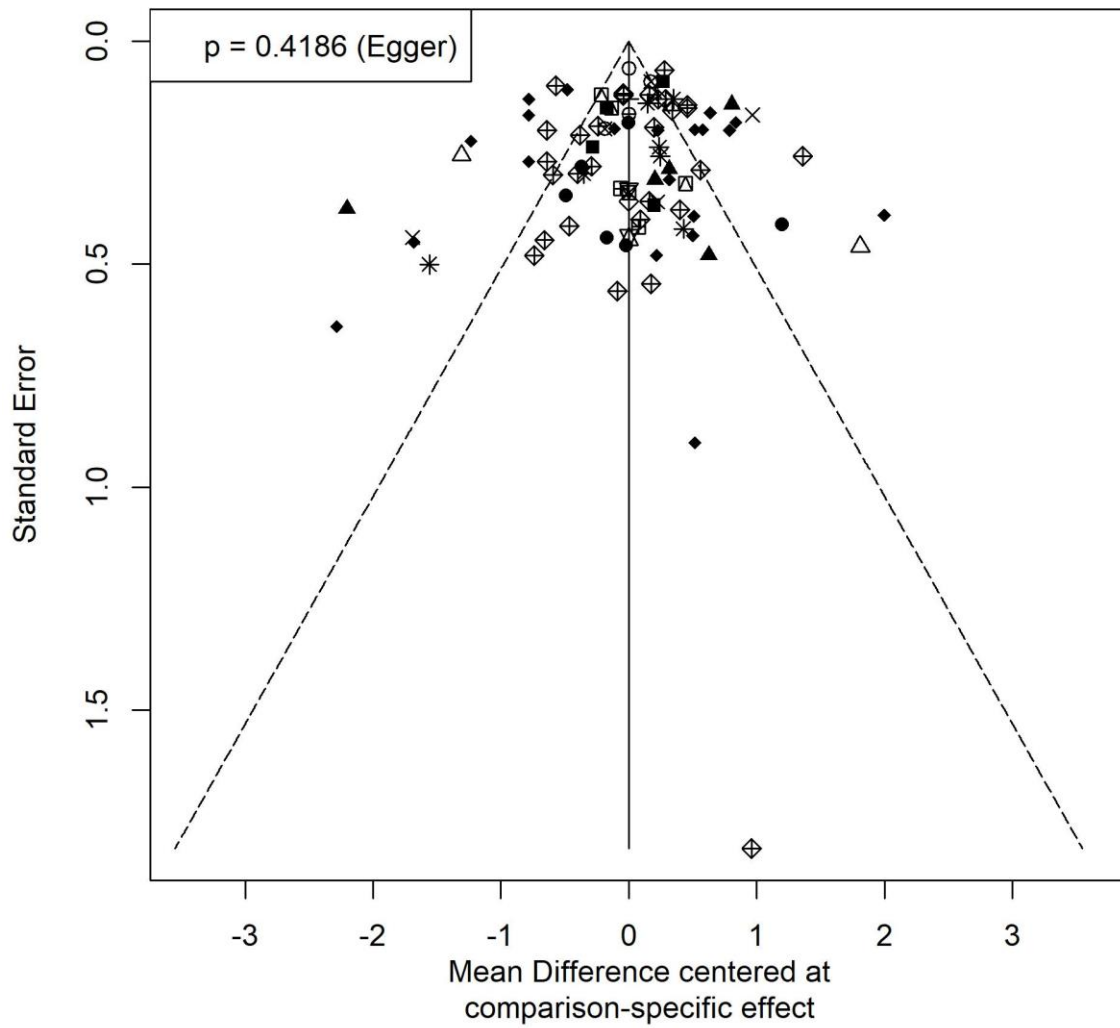

# PONV

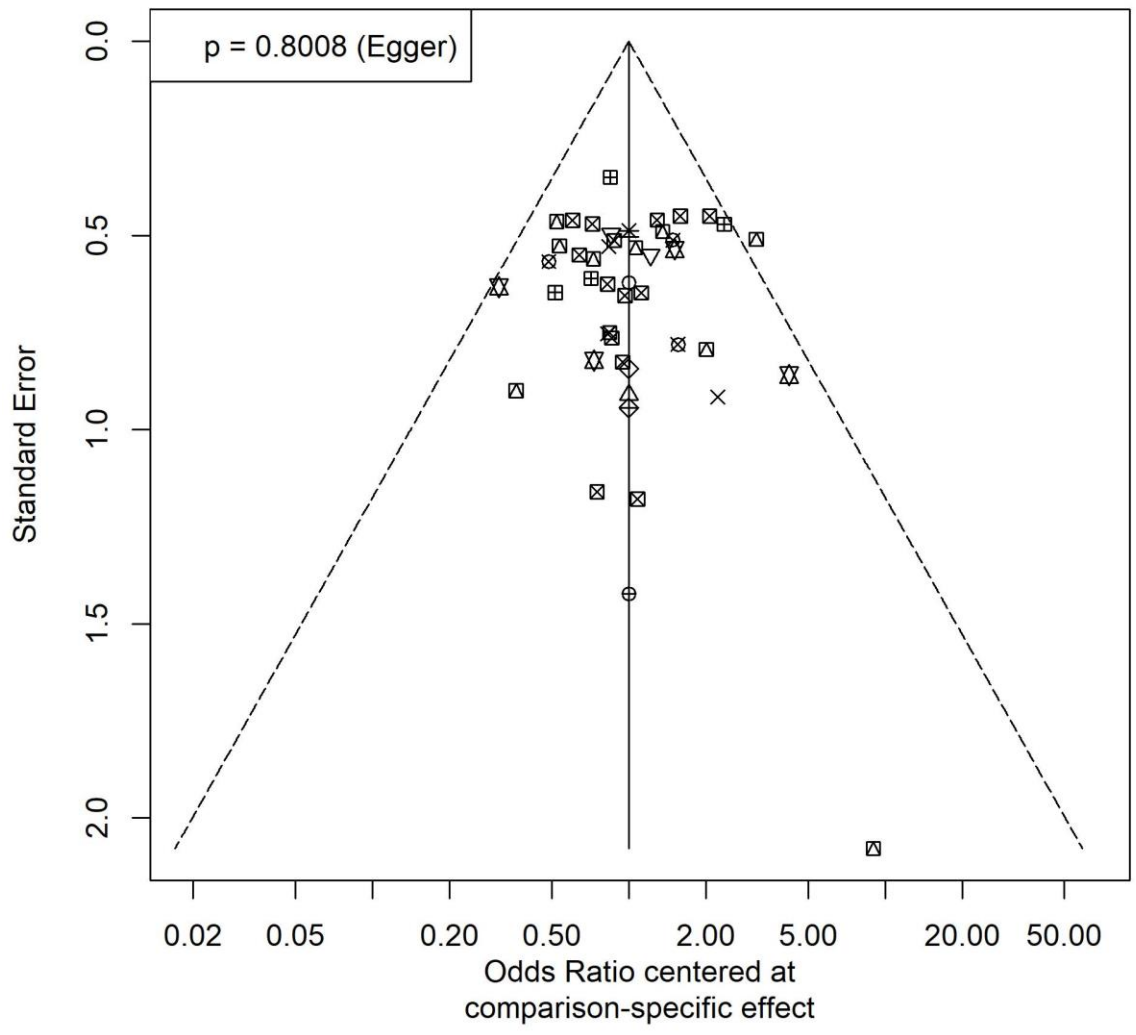

# Use of Rescue Analgesics

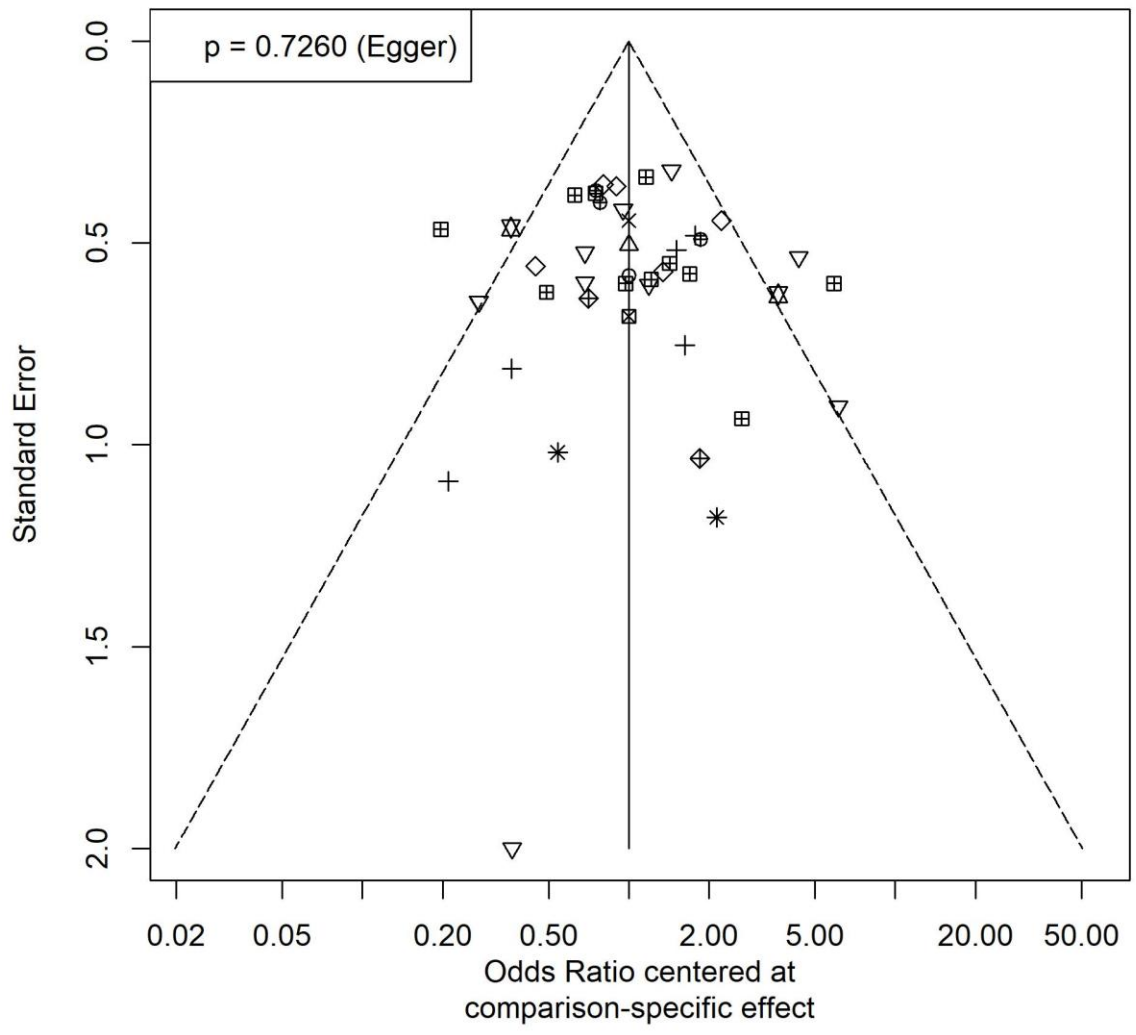

Supplement: kja-22366-suppl5.pdf [file kja-22366-suppl5.pdf]
